# Supplementary material for: Add-on Iguratimod or Tacrolimus in Methotrexate Inadequate Rheumatoid Arthritis: Efficacy, Safety and Propensity Score-Matched Analysis
Source: Research Square preprint supplement (doi:10.21203/rs.3.rs-8026013/v1), 2025-11-23
Supplement: Supplementary file 1 [file 1dd0758560e919515b5f3095.docx]

Supplementary Table 2. Longitudinal comparison of disease activity measures between IGU and TAC groups after propensity score matching

|  |  | baseline | 12w | 24w | 36w | 52w |
| --- | --- | --- | --- | --- | --- | --- |
| TJC28 | IGU | 1(0–2) | 0(0–1) | 0(0–0) | 0(0–0) | 0(0–0) |
|  | TAC | 1(0–1) | 0(0–0) | 0(0–0) | 0(0–1) | 0(0–0) |
|  | P value | 0.61 | 0.44 | 0.73 | 0.41 | 0.76 |
| SJC28 | IGU | 2(1–4) | 0(0–1) | 1(0–2) | 0(0–1) | 0(0–2) |
|  | TAC | 2(1–4) | 0(0–1) | 1(0–2) | 0(0–1) | 0(0–1) |
|  | P value | 0.42 | 0.72 | 0.90 | 0.82 | 0.42 |
| PGA, 0–10 scale | IGU | 3.1(1.8–4.9) | 2.1(0.6–4.1) | 2.5(0.9–3.7) | 2.0(0.8–3.9) | 2.3(0.4–4.9) |
|  | TAC | 4.5(1.9–5.7) | 1.9(0.8–3.5) | 1.7(1.0–4.1) | 1.6(0.5–4.8) | 1.3(0.6–3.9) |
|  | P value | 0.54 | 0.86 | 0.73 | 0.53 | 0.49 |
| PhGA, 0–10 scale | IGU | 2.0(1.2–3.0) | 0.8(0.5–1.3) | 0.8(0.1–1.5) | 0.5(0.1–1.4) | 0.7(0.3–1.8) |
|  | TAC | 2.6(1.5–4.0) | 0.7(0.5–1.6) | 0.8(0.5–2.4) | 0.5(0–2.0) | 0.5(0–1.5) |
|  | P value | 0.24 | 0.99 | 0.61 | 0.91 | 0.51 |
| SDAI | IGU | 8.4(6.0–12.7) | 4.2(1.4–8.3) | 4.4(1.6–9.7) | 4.3(1.0–9.7) | 3.8(1.5–10.1) |
|  | TAC | 10.9(7.8–15.0) | 3.7(2.2–7.4) | 5.1(2.6–8.1) | 4.0(1.5–8.1) | 3.5(1.1–6.6) |
|  | P value | 0.24 | 0.95 | 0.97 | 0.82 | 0.50 |
| CDAI | IGU | 8.0(5.7–12.1) | 3.9(1.3–6.9) | 4.1(1.4–9.2) | 4.1(0.9–8.2) | 3.5(1.3–9.8) |
|  | TAC | 10.1(7.1–13.9) | 3.5(2.2–6.3) | 5.0(2.1–7.6) | 3.9(1.2–7.6) | 3.4(0.9–6.0) |
|  | P value | 0.29 | 0.89 | 0.88 | 0.92 | 0.56 |
| DAS28-CRP | IGU | 2.8(2.3–3.4) | 1.9(1.5–2.6) | 2.0(1.5–2.7) | 1.8(1.4–2.7) | 2.0(1.5–2.8) |
|  | TAC | 2.9(2.4–3.4) | 1.7(1.5–2.3) | 1.9(1.6–2.4) | 2.0(1.5–2.4) | 1.9(1.4–2.3) |
|  | P value | 0.57 | 0.75 | 0.92 | 0.98 | 0.32 |
| HAQ-DI | IGU | 0.25(0–0.75) | 0.12(0–0.38) | 0.12(0–0.44) | 0.12(0–0.31) | 0(0–0.34) |
|  | TAC | 0.44(0.12–0.75) | 0.12(0–0.75) | 0.25(0–0.62) | 0.06(0–0.41) | 0.12(0–0.62) |
|  | P value | 0.46 | 0.93 | 0.60 | 0.80 | 0.51 |
| CRP (mg/dL) | IGU | 0.36(0.17–0.53) | 0.25(0.05–0.59) | 0.21(0.08–0.58) | 0.15(0.05–0.95) | 0.24(0.06–0.64) |
|  | TAC | 0.44(0.21–0.94) | 0.17(0.04–0.56) | 0.20(0.06–0.60) | 0.18(0.05–0.51) | 0.11(0.05–0.38) |
|  | P value | 0.30 | 0.72 | 0.67 | 0.77 | 0.28 |
| ESR (mm/hour) | IGU | 26(14–34) | 17(12–33) | 20(14–30) | 18(10–34) | 20(12–32) |
|  | TAC | 23(16–45) | 17(9–25) | 14(8–22) | 14(8–21) | 15(8–23) |
|  | P value | 0.73 | 0.53 | 0.13 | 0.22 | 0.18 |
| MMP-3 (ng/mL) | IGU | 91.1(63.4–111.1) | 70.6(49.6–89.6) | 60.2(37.0–82.3) | 61.1(47.0–83.5) | 62.5(46.1–79.7) |
|  | TAC | 111.4(57.0–196.7) | 82.1(54.4–176.0) | 83.7(54.8–121.1) | 74.5(44.9–96.7) | 66.2(46.6–89.4) |
|  | P value | 0.51 | 0.36 | 0.05 | 0.30 | 0.68 |

Data are median (IQR)

IGU, iguratimod; TAC, tacrolimus; TJC28, tender joint count using 28 joints; SJC28, swollen joint count using 28 joints; PGA, patient's global assessment; PhGA, physician global assessment; SDAI, Simplified Disease Activity Index, CDAI, Clinical Disease Activity Index; DAS, Disease Activity Score; CRP, C-reactive protein; HAQ-DI, Health Assessment Questionnaire-Disability Index; ESR, erythrocyte sedimentation rate; MMP-3, matrix metalloproteinase-3
