# Supplementary material for: Add-on Iguratimod or Tacrolimus in Methotrexate Inadequate Rheumatoid Arthritis: Efficacy, Safety and Propensity Score-Matched Analysis
Source: Research Square preprint supplement (doi:10.21203/rs.3.rs-8026013/v1), 2025-11-23
Supplement: Supplementary file 2 [file 44eaf19dc9a83f79422c2f35.docx]

Supplementary Table 1. Disease activity and laboratory parameters over time in IGU and TAC groups before propensity score matching

|  | IGU | | | | |  | TAC | | | | |
| --- | --- | --- | --- | --- | --- | --- | --- | --- | --- | --- | --- |
|  | baseline | 12w | 24w | 36w | 52w |  | baseline | 12w | 24w | 36w | 52w |
| TJC28 | 1(0–2) | 0(0–0.25)* | 0(0–0)* | 0(0–0)* | 0(0–0.25) |  | 1(0–1) | 0(0–0)* | 0(0–0)* | 0(0–0)* | 0(0–0)* |
| SJC28 | 2(1–3) | 2(1–3)* | 0(0–1)* | 0(0–1)* | 0(0–1.25)* |  | 3(1–5) | 1(0–2.25)* | 1(0–2.25)* | 0(0–2)* | 0(0–1)* |
| PGA, 0–10 scale | 2.8(1.6–4.1) | 1.7(0.6–4.3) | 1.5(0.8–3.7) | 1.6(0.7–3.7) | 1.7(0.7–5.1) |  | 4.5(2.1–5.7) | 1.9(0.7–3.7)* | 2.2(0.9–4.4) | 1.8(0.5–4.2)* | 1.8(0.7–4.9)* |
| PhGA, 0–10 scale | 1.9(1.0–2.6) | 0.8(0.3–1.3)* | 0.5(0.3–1.5)* | 0.5(0.2–1.2)* | 0.5(0.2–1.7)* |  | 3.0(1.8–4.5) | 1.0(0.5–1.9)* | 1.0(0.5–2.3)* | 0.8(0.3–2.0)* | 0.5(0.2–1.6)* |
| SDAI | 7.4(5.9–10.6) | 4.4(1.5–8.0)* | 4.1(1.5–6.9)* | 4.4(1.2–7.5)* | 4.4(1.3–8.8)* |  | 11.8(9.0–16.0) | 4.1(2.3–8.1)* | 5.3(2.7–8.4)* | 3.9(2.1–8.2)* | 4.1(1.6–7.2)* |
| CDAI | 6.8(5.5–10.0) | 4.1(1.3–7.5)* | 3.5(1.3–6.6)* | 3.7(1.1–6.9)* | 3.8(1.2–8.3)* |  | 11.1(8.7–14.4) | 4.0(2.3–7.3)* | 5.0(2.4–7.9)* | 3.6(2.0–8.0)* | 3.9(1.5–6.7)* |
| DAS28-CRP | 2.5(2.1–3.0) | 1.9(1.5–2.6)* | 2.0(1.4–2.5)* | 1.9(1.5–2.6)* | 2.1(1.4–2.7)* |  | 3.0(2.5–3.6) | 1.8(1.5–2.5)* | 1.9(1.6–2.4)* | 2.0(1.5–2.5)* | 1.9(1.4–2.4)* |
| HAQ-DI | 0.19(0–0.53) | 0.12(0–0.38) | 0(0–0.44) | 0.06(0–0.38) | 0(0–0.25) |  | 0.31(0.12–0.75) | 0.12(0–0.75) | 0.25(0–0.62) | 0.12(0–0.50)* | 0.12(0–0.62)* |
| CRP (mg/dL) | 0.30(0.15–0.54) | 0.20(0.10–0.39) | 0.16(0.08–0.51) | 0.16(0.09–0.57) | 0.23(0.06–0.71) |  | 0.53(0.25–1.21) | 0.17(0.06–0.53)* | 0.17(0.06–0.56)* | 0.17(0.06–0.51)* | 0.14(0.06–0.44)* |
| ESR (mm/hour) | 17(12–34) | 16(11-26) | 19(12–28) | 16(10–31) | 18(11–31) |  | 24(13–41) | 16(9–25) | 15(8–24)* | 15(9–22)* | 15(8–21)* |
| MMP-3 (ng/mL) | 78.6(60.7–111.0) | 70.1(49.6–85.9) | 62.4(44.3–78.0)* | 62.2(48.2–78.3)* | 62.8(50.9–82.4)* |  | 111.4(62.6–240.9) | 81.8(53.7–134.2) | 78.8(55.4–115.0)* | 72.2(56.5–94.4)* | 67.6(49.0–93.5)* |

Data are median (IQR), * p < 0.05 compared to baseline values

IGU, iguratimod; TAC, tacrolimus; TJC28, tender joint count using 28 joints; SJC28, swollen joint count using 28 joints; PGA, patient's global assessment; PhGA, physician global assessment; SDAI, Simplified Disease Activity Index, CDAI, Clinical Disease Activity Index; DAS, Disease Activity Score; CRP, C-reactive protein; HAQ-DI, Health Assessment Questionnaire-Disability Index; ESR, erythrocyte sedimentation rate; MMP-3, matrix metalloproteinase-3
