# Supplementary material for: Add-on Iguratimod or Tacrolimus in Methotrexate Inadequate Rheumatoid Arthritis: Efficacy, Safety and Propensity Score-Matched Analysis
Source: Research Square preprint supplement (doi:10.21203/rs.3.rs-8026013/v1), 2025-11-23
Supplement: Supplementary file 3 [file 4b8486cf4715d2d6e145929b.docx]

Supplementary Table 3. CTCAE v5.0 Grade 2 or higher Adverse Events in IGU and TAC Treatment Groups

| CTCAE v 5.0 grade | adverse event | IGU, n=56 | TAC, n=52 | total |
| --- | --- | --- | --- | --- |
| Grade 2 | Upper respiratory infection | 8 | 2 | 10 |
|  | Anemia | 5 | 4 | 9 |
|  | Mucositis oral | 4 | 1 | 5 |
|  | Shingles | 2 | 2 | 4 |
|  | Urticaria | 2 | 0 | 2 |
|  | Creatinine increased | 1 | 1 | 2 |
|  | Anorexia | 1 | 1 | 2 |
|  | Aminotransferase increased | 1 | 0 | 1 |
|  | Eczema | 1 | 0 | 1 |
|  | Gastritis | 1 | 0 | 1 |
|  | Keratitis | 1 | 0 | 1 |
|  | Pharyngitis | 1 | 0 | 1 |
|  | Wrist fracture | 1 | 0 | 1 |
|  | Bladder infection | 0 | 1 | 1 |
|  | Enterocolitis | 0 | 1 | 1 |
|  | Fracture | 0 | 1 | 1 |
|  | Lung infection | 0 | 1 | 1 |
|  | Malaise | 0 | 1 | 1 |
| Grade 3 | Mucositis oral | 1 | 0 | 1 |
|  | Wrist fracture | 1 | 0 | 1 |
|  | Colonic hemorrhage | 0 | 1 | 1 |
|  | Enterocolitis infectious | 0 | 1 | 1 |
|  | Hip fracture | 0 | 1 | 1 |
|  | Ileus | 0 | 1 | 1 |

Data are number

IGU, iguratimod; TAC, tacrolimus
